# Supplementary material for: Amorphous iron oxide–selenite composite microspheres with a yolk–shell structure as highly efficient anode materials for lithium-ion batteries
Source: Royal Society of Chemistry journal article supplement (doi:10.1039/d0nr01905d), 2020-01-01
Supplement: d0nr01905d1.pdf [file d0nr01905d1.pdf]

## SUPPLEMENTARY INFORMATION

### **Amorphous iron oxide-selenite composite microspheres with yolk-shell structure as highly efficient anode material for lithium-ion batteries**

Ju Hyeong Kim<sup>‡</sup>, Gi Dae Park<sup>‡</sup>, Yun Chan Kang\*

*Department of Materials Science and Engineering, Korea University, Anam-Dong, Seongbuk-Gu, Seoul 136-713, Republic of Korea.*

\* Corresponding author. *E-mail address:* [yckang@korea.ac.kr](mailto:yckang@korea.ac.kr) (Yun Chan Kang)

<sup>‡</sup> The authors contributed equally to this work.

## Experimental Section

### 1. Materials characterization

The morphologies of the prepared microspheres were investigated using scanning electron microscopy (SEM, VEGA3) and transmission electron microscopy (TEM, JEM-2100F). The crystal structures and chemical properties of the prepared microspheres were analyzed using X-ray diffraction spectroscopy (XRD, X'pert PRO with Cu K $\alpha$  radiation,  $\lambda = 1.5418 \text{ \AA}$ ) at the Korea Basic Science Institute, Daegu, and X-ray photoelectron spectroscopy (XPS, Thermo Scientific<sup>TM</sup>, K-Alpha<sup>TM</sup>). Ex-situ XPS analyses at the first fully discharged and charged states after argon-ion gun etching were also performed with the above measuring equipment. The properties and the amount of pitch derived carbon was characterized via thermogravimetric analysis (TGA, Pyris 1 Thermogravimetric Analyzer, PerkinElmer) in the range of 25–700 °C at 10 °C min<sup>-1</sup> in an air-based atmosphere, respectively. The surface area and porosities of samples were analyzed using the Brunauer–Emmett–Teller (BET) method with high-purity N<sub>2</sub>.

### 2. Electrochemical measurements

The electrochemical properties of the the prepared microspheres were analyzed using a 2032-type coin cell. The anode was prepared by mixing the active material, carbon black, and sodium carboxymethyl cellulose in a weight ratio of 7:2:1. Lithium metal and microporous polypropylene films were used as counter electrode and separator, respectively. The electrolyte was 1.0 M LiPF<sub>6</sub> dissolved in a mixture of fluoroethylene carbonate–dimethyl carbonate (FEC/DMC; 1:1 v/v). The discharge and charge characteristics of the samples were investigated by cycling in the potential range of 0.001–3.0 V at various current densities. Cyclic voltammograms (CVs) were measured at a scan rate of 0.1 mV s<sup>-1</sup>. Electrochemical impedance spectroscopy (EIS) was performed on the electrode over a frequency range of 0.01–100 kHz. In-situ EIS analysis was performed at preselected potentials during the discharge and charge processes at a current density of 0.1 A g<sup>-1</sup>.

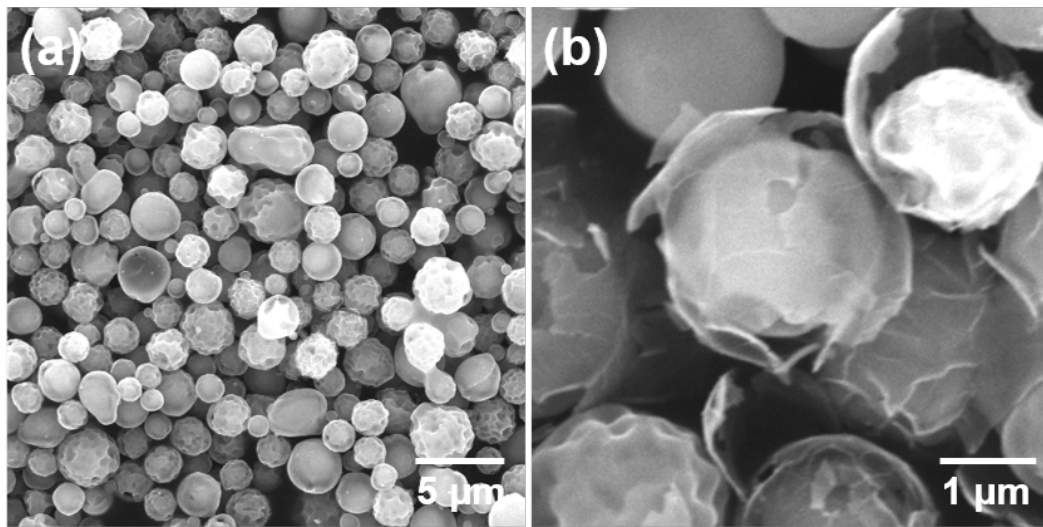

**Fig. S1.** Morphologies of yolk-shell structured  $\alpha\text{-Fe}_2\text{O}_3$  microspheres.

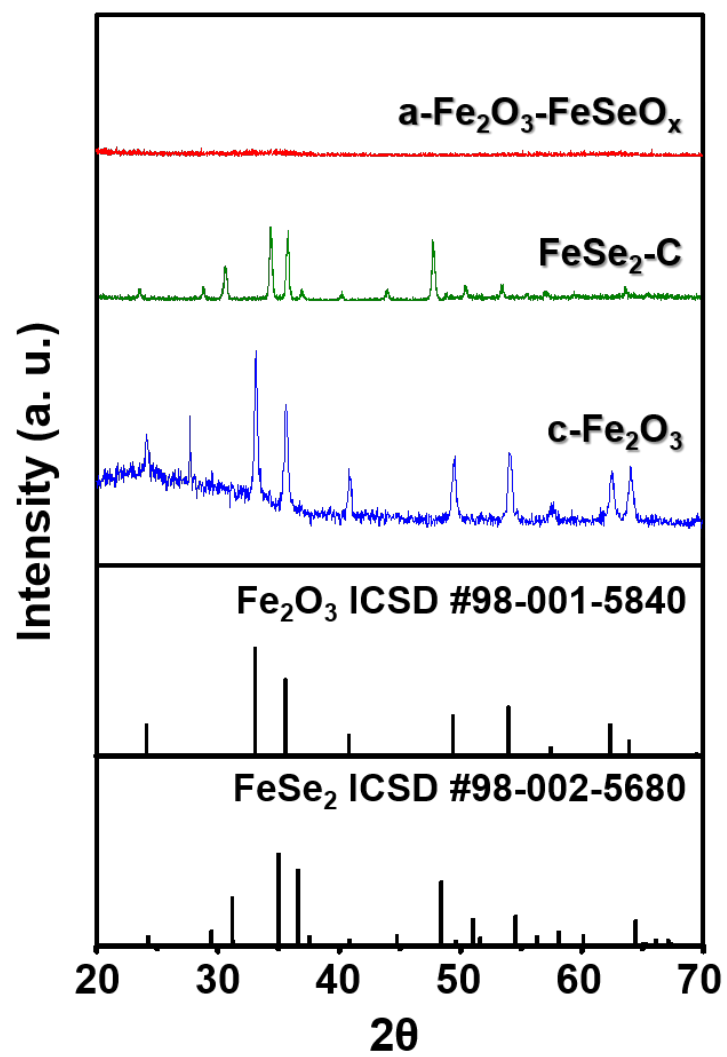

**Fig. S2.** XRD patterns of  $c\text{-Fe}_2\text{O}_3$ ,  $\text{FeSe}_2\text{-C}$ , and  $a\text{-Fe}_2\text{O}_3\text{-FeSeO}_x$  microspheres.

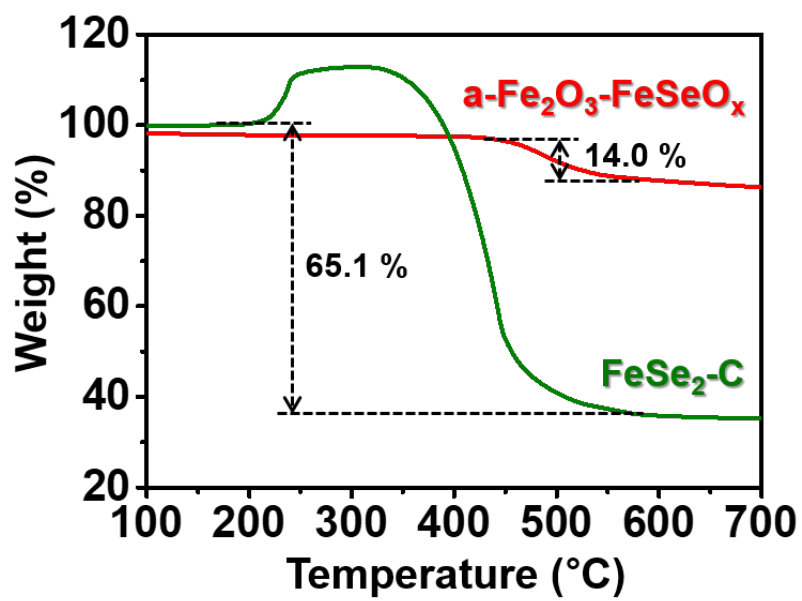

**Fig. S3.** TGA curves of  $\text{FeSe}_2\text{-C}$  and  $a\text{-Fe}_2\text{O}_3\text{-FeSeO}_x$  microspheres.

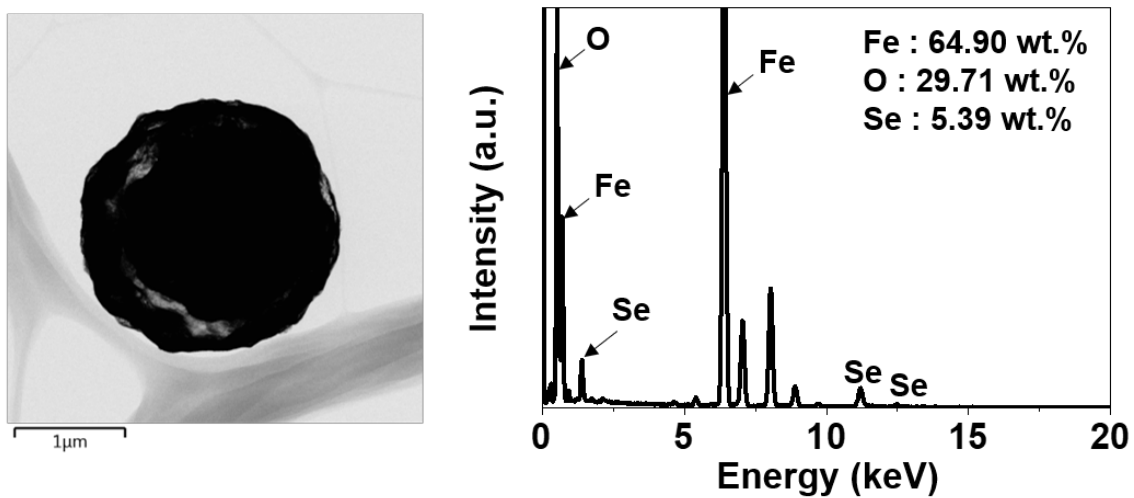

**Fig. S4.** EDX spectrum of  $\alpha$ -Fe<sub>2</sub>O<sub>3</sub>-FeSeO<sub>x</sub> microspheres.

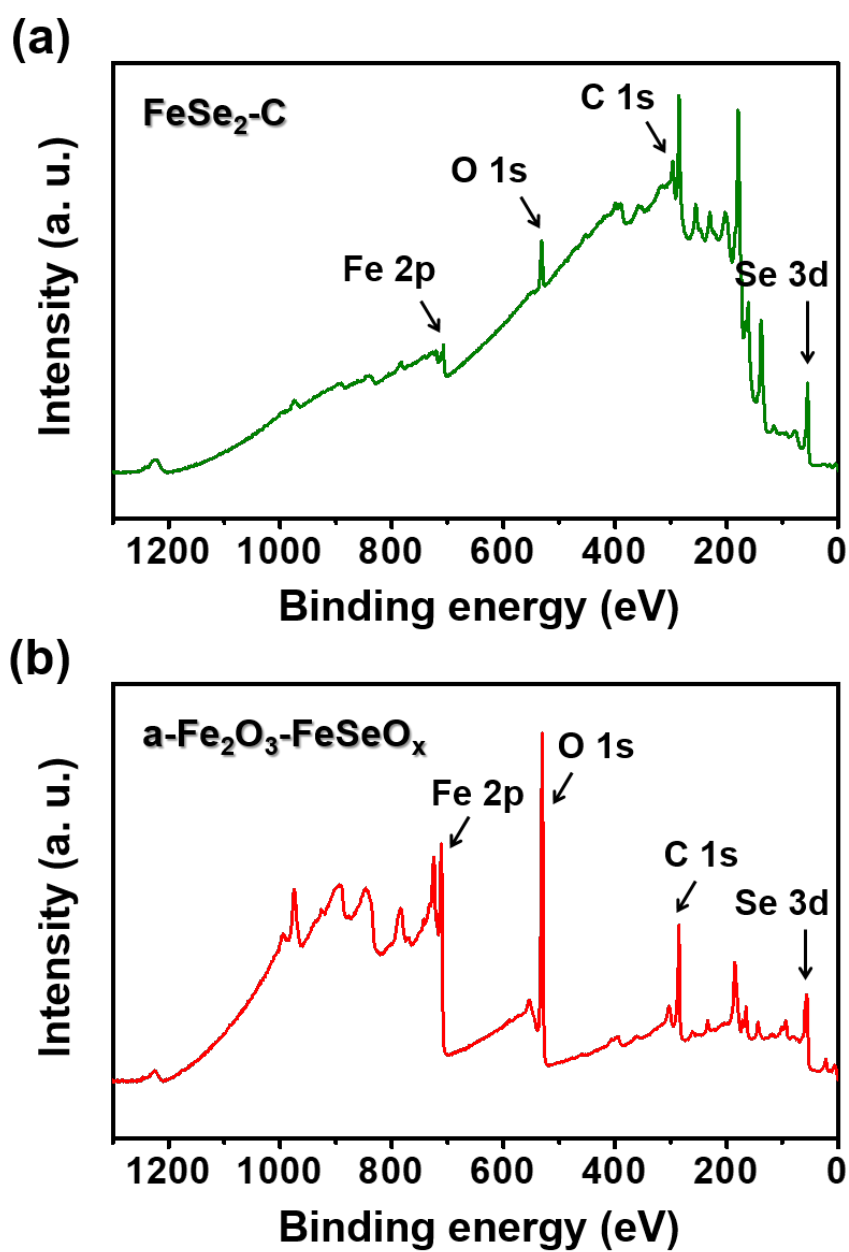

**Fig. S5.** XPS survey scans of FeSe<sub>2</sub>-C and a-Fe<sub>2</sub>O<sub>3</sub>-FeSeO<sub>x</sub> microspheres.

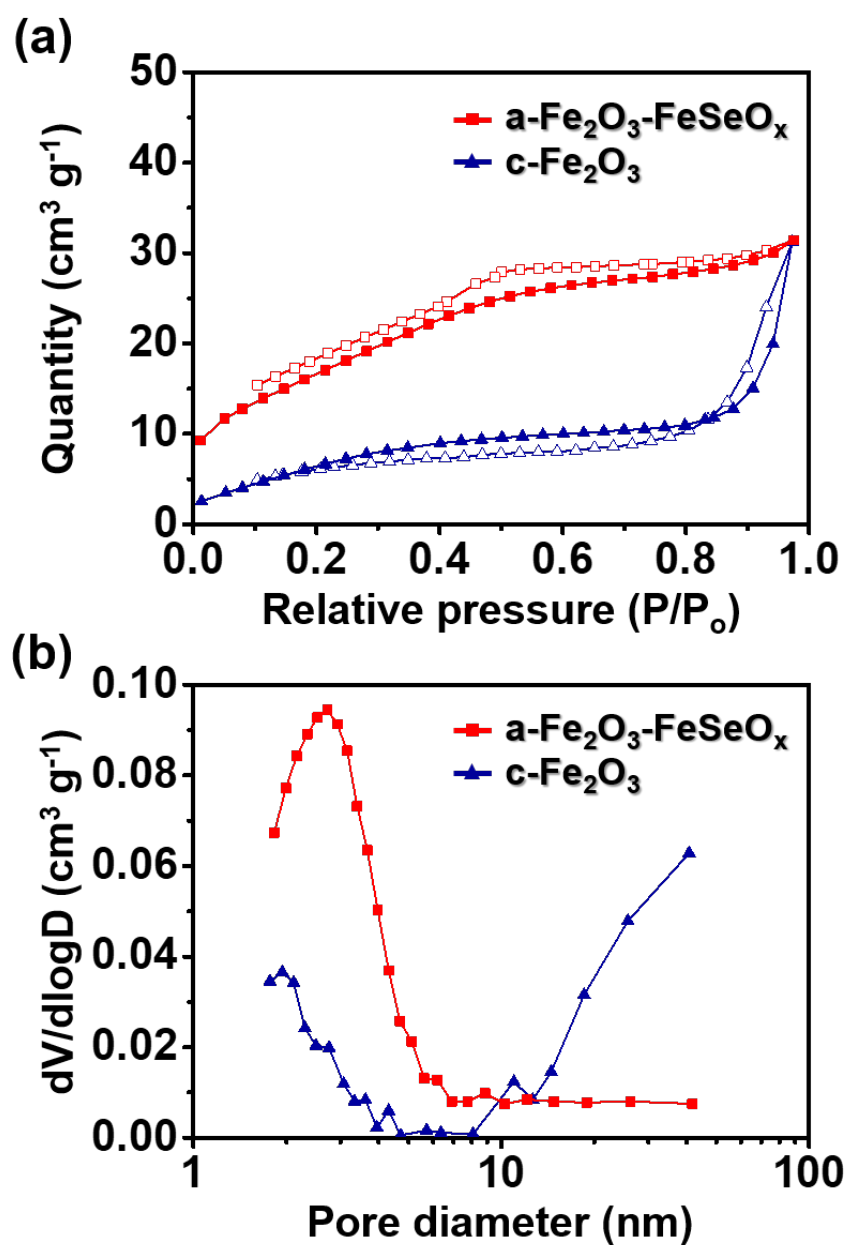

**Fig. S6.** (a)  $\text{N}_2$  gas adsorption-desorption isotherm curves and (b) BJH pore size distributions of  $c\text{-Fe}_2\text{O}_3$  and  $a\text{-Fe}_2\text{O}_3\text{-FeSeO}_x$  microspheres.



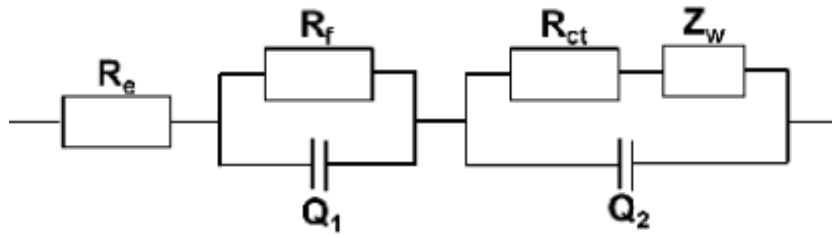

$R_e$  : the electrolyte resistance, corresponding to the intercept of high frequency semicircle at  $Z_{re}$  axis

$R_f$  : the SEI layer resistance corresponding to the high-frequency semicircle

$Q_1$  : the dielectric relaxation capacitance corresponding to the high-frequency semicircle

$R_{ct}$ : the denote the charger transfer resistance related to the middle-frequency semicircle

$Q_2$  : the associated double-layer capacitance related to the middle-frequency semicircle

$Z_w$  : the Li-ion diffusion resistance

**Fig. S7.** Equivalent circuit model used for AC impedance fitting.

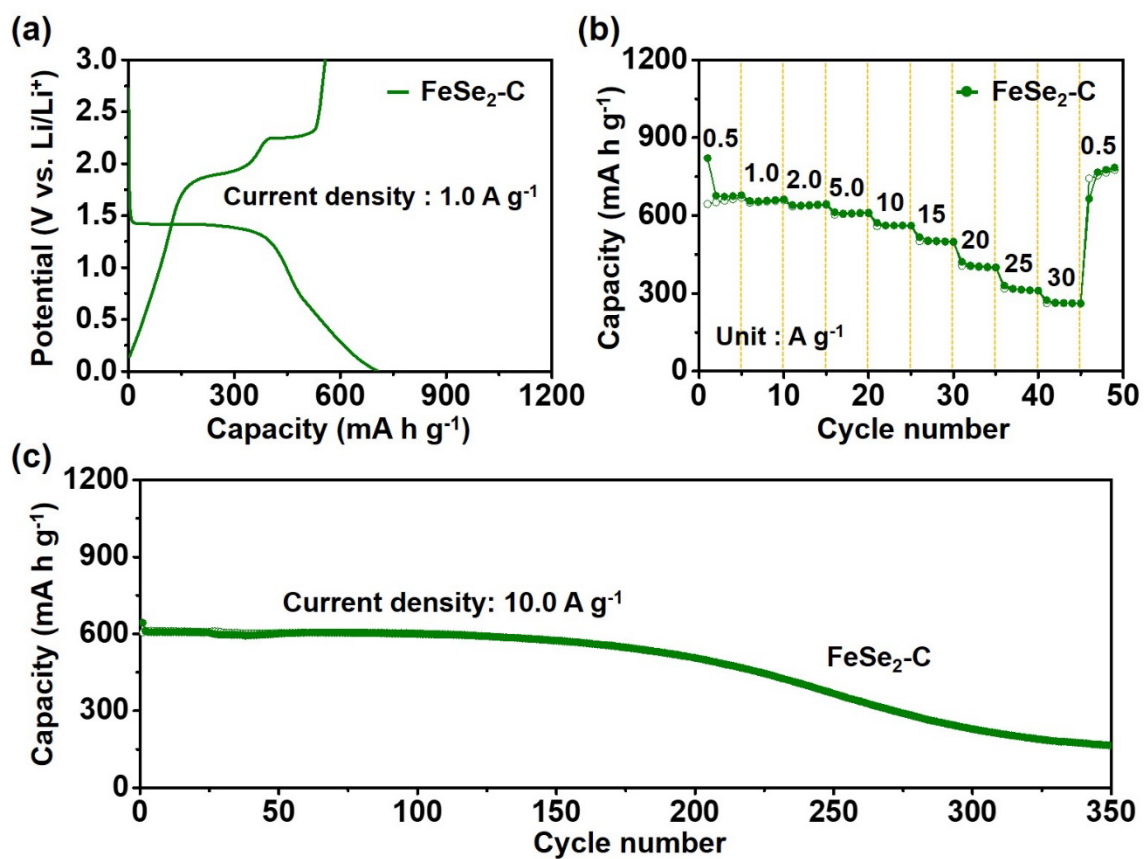

**Fig. S8.** Electrochemical properties of FeSe<sub>2</sub>-C electrodes: (a) first galvanostatic discharge-charge profile, (b) rate performance, (c) cycling performance at a current density of 10 A g<sup>-1</sup>.

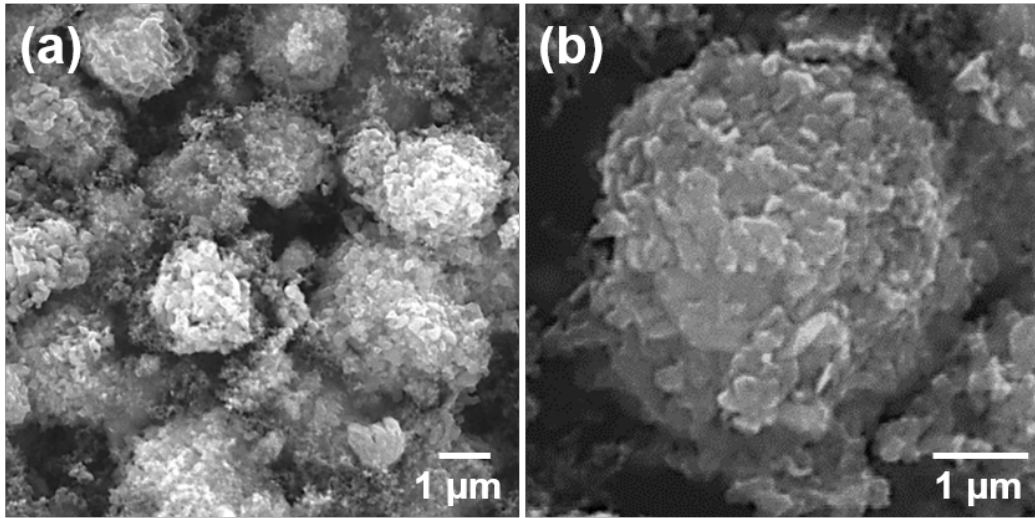

**Fig. S9.** SEM images of  $\alpha$ - $\text{Fe}_2\text{O}_3$ - $\text{FeSeO}_x$  microspheres obtained after 100 cycles.

| <b>Materials</b>                                       | <b>Fe [wt%]</b> | <b>O [wt%]</b> | <b>Se [wt%]</b> |
|--------------------------------------------------------|-----------------|----------------|-----------------|
| <b>a-Fe<sub>2</sub>O<sub>3</sub>-FeSeO<sub>x</sub></b> | <b>65.40</b>    | <b>29.12</b>   | <b>5.48</b>     |

**Table S1.** Compositions of the a-Fe<sub>2</sub>O<sub>3</sub>-FeSeO<sub>x</sub> microspheres determined from ICP-OES analysis.
